# Supplementary material
Source: PubMed Central journal article supplement (PMC3697463)

## **Supplemental Movies**

### **Movie 1:**

Traffic of GFP-NKIN2 labeled endosomes in a branch of a leading hypha of *N. crassa*. Wide-field fluorescence microscopy. The time is displayed in the movie in seconds.

### **Movie 2:**

Dynamics of GFP-NKIN2 labeled spots in a leading hypha of *N. crassa*. Wide-field fluorescence microscopy. The time is displayed in the movie in seconds.

### **Movie 3:**

Bi-directional traffic of GFP-YPT52 labeled early endosomes in a germling of *N. crassa* wild type (FGSC 9717). Wide-field fluorescence microscopy. The time is displayed in the movie in seconds.

### **Movie 4:**

Wide-field fluorescence of GFP-YPT52 labeled early endosomes in *N. crassa*  $\Delta nkin2$  germling. The time is displayed in the movie in seconds.

### **Movie 5:**

Motility defects of GFP-YPT52 labeled early endosomes in a *N. crassa* *ro-10* germling. Wide-field fluorescence microscopy. The time is displayed in the movie in seconds.

## Supplemental Figures

### Fig. S1

Deletion of *nkin2*. Scheme of the deletion procedure and corresponding Southern blots. DNA was digested with *Eco*NI and *Bam*HI. The probes are indicated above.

### Fig. S2

Dendrogram of EE-specific Rab5 GTPases from *Homo sapiens*, *Mus musculus*, *Saccharomyces cerevisiae*, *Ustilago maydis*, *Aspergillus nidulans* and *Neurospora crassa*. The tree was constructed by CLC Sequence Viewer 6 (Neighbor Joining algorithm with bootstrap 1000 analysis).

### Fig. S3

Analysis of septation (**A, B**) and vacuole distribution (**C**) in wild type and  $\Delta nkin2$ . (**D**) GFP-NKIN2<sup>rigor</sup> in  $\Delta nkin2$  binds specifically to a MT-subpopulation, which traverses several septa in one hypha (arrowheads). Scale bar, 100  $\mu$ m in A, B, 20  $\mu$ m in C and 5  $\mu$ m in D.

### Fig. S4

Analysis of mitochondrial distribution and migration. Mitochondrial behavior was not affected in *nkin2*-deletion strains in comparison to wild type. Mitochondria of germinated hyphae were stained with MitoTracker Red. Scale bar, 5  $\mu$ m.

### Fig. S5

Co-localization of GFP-microtubules and mitochondria stained by MitoTracker Red in wild type confirms some linkage of mitochondria to microtubules (arrowheads), but also some mitochondria, which are not associated to microtubules (asterisks). Scale bar, 5  $\mu$ m.

### Fig. S6

(**A**) GFP-NKIN3 and (**B**) GFP-NKIN3<sup>rigor</sup> localize in the cytoplasm and vacuoles. Vacuoles were stained by CMAC in subapical regions of the wild type. Scale bars, 10  $\mu$ m.

Fig. S1

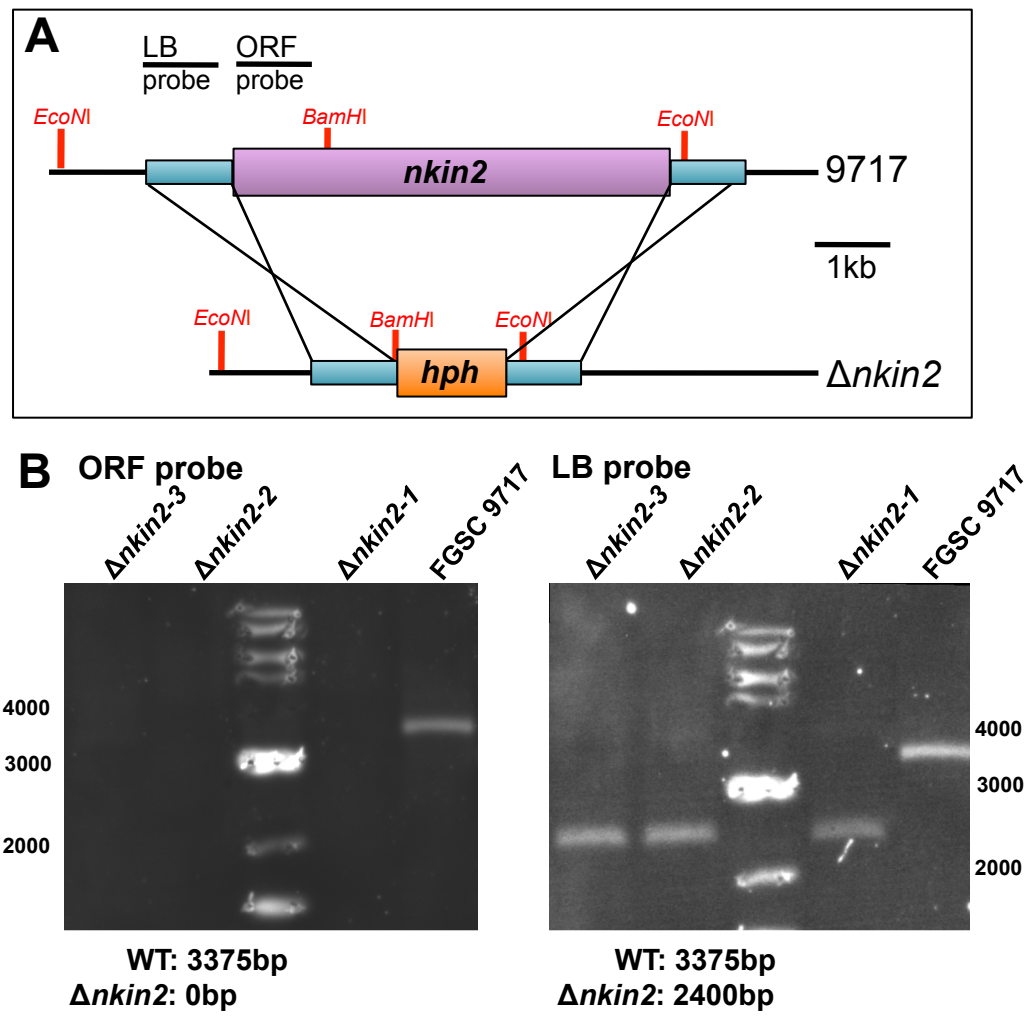

Fig. S2

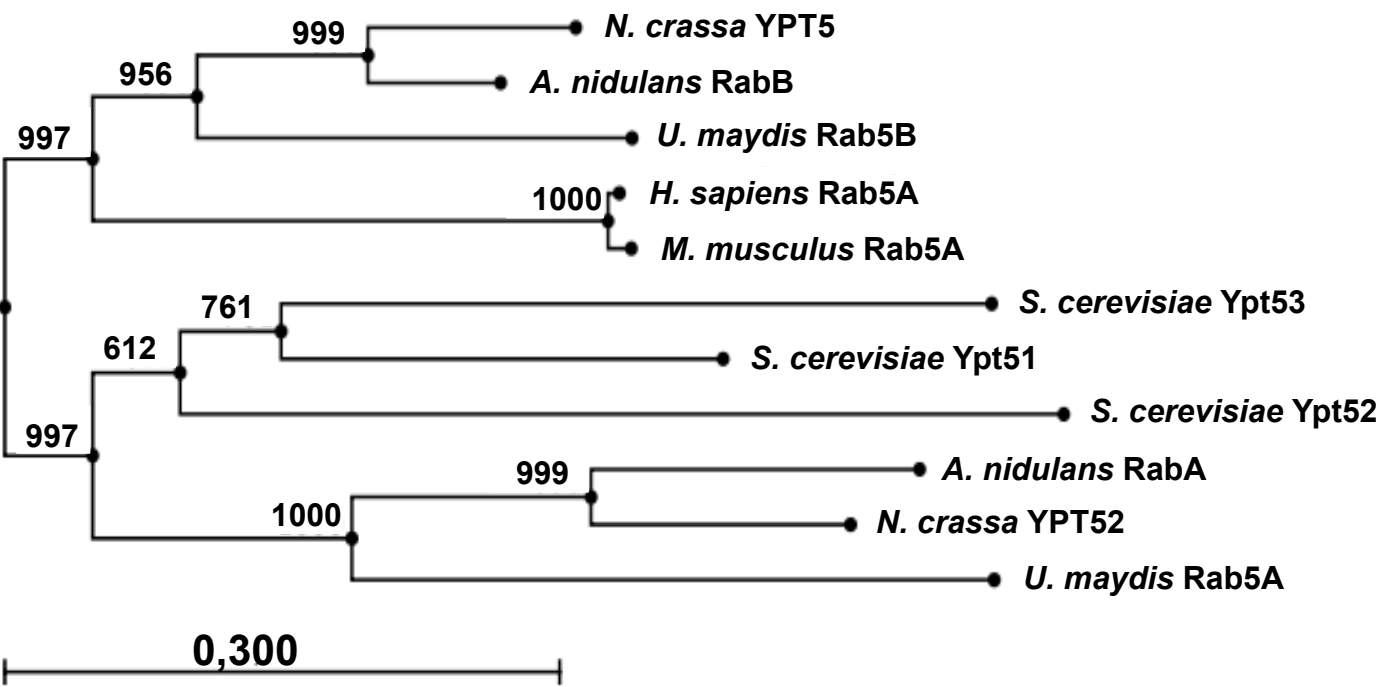

Fig. S3

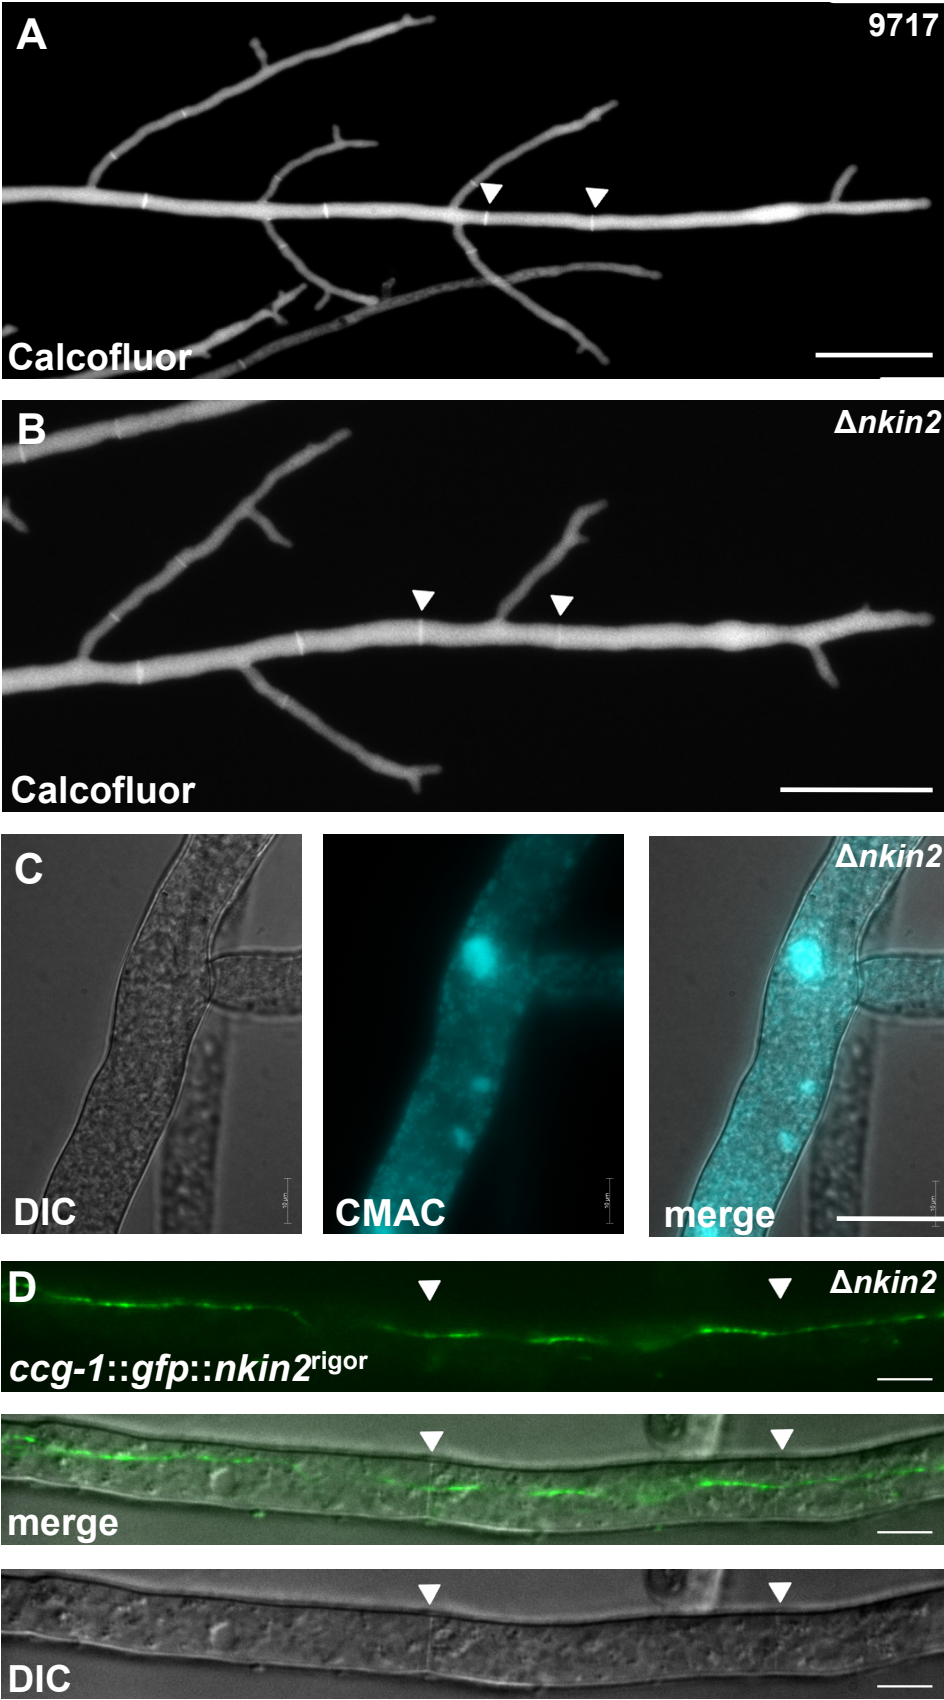

Fig. S4

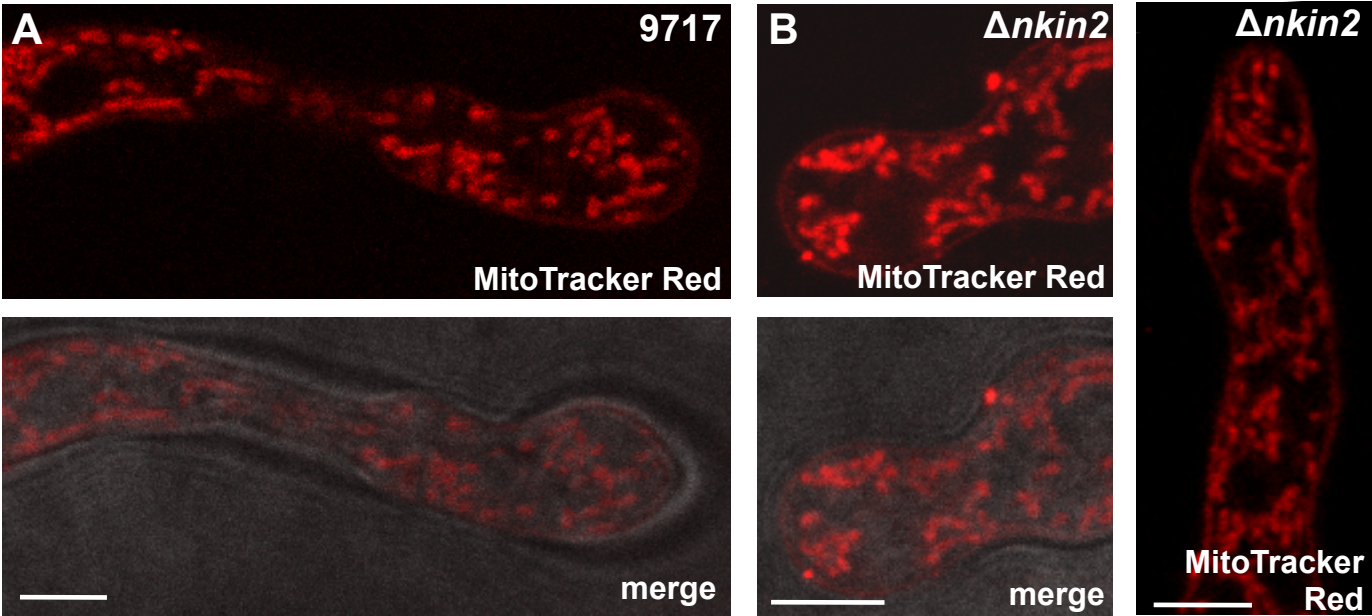

Fig. S5

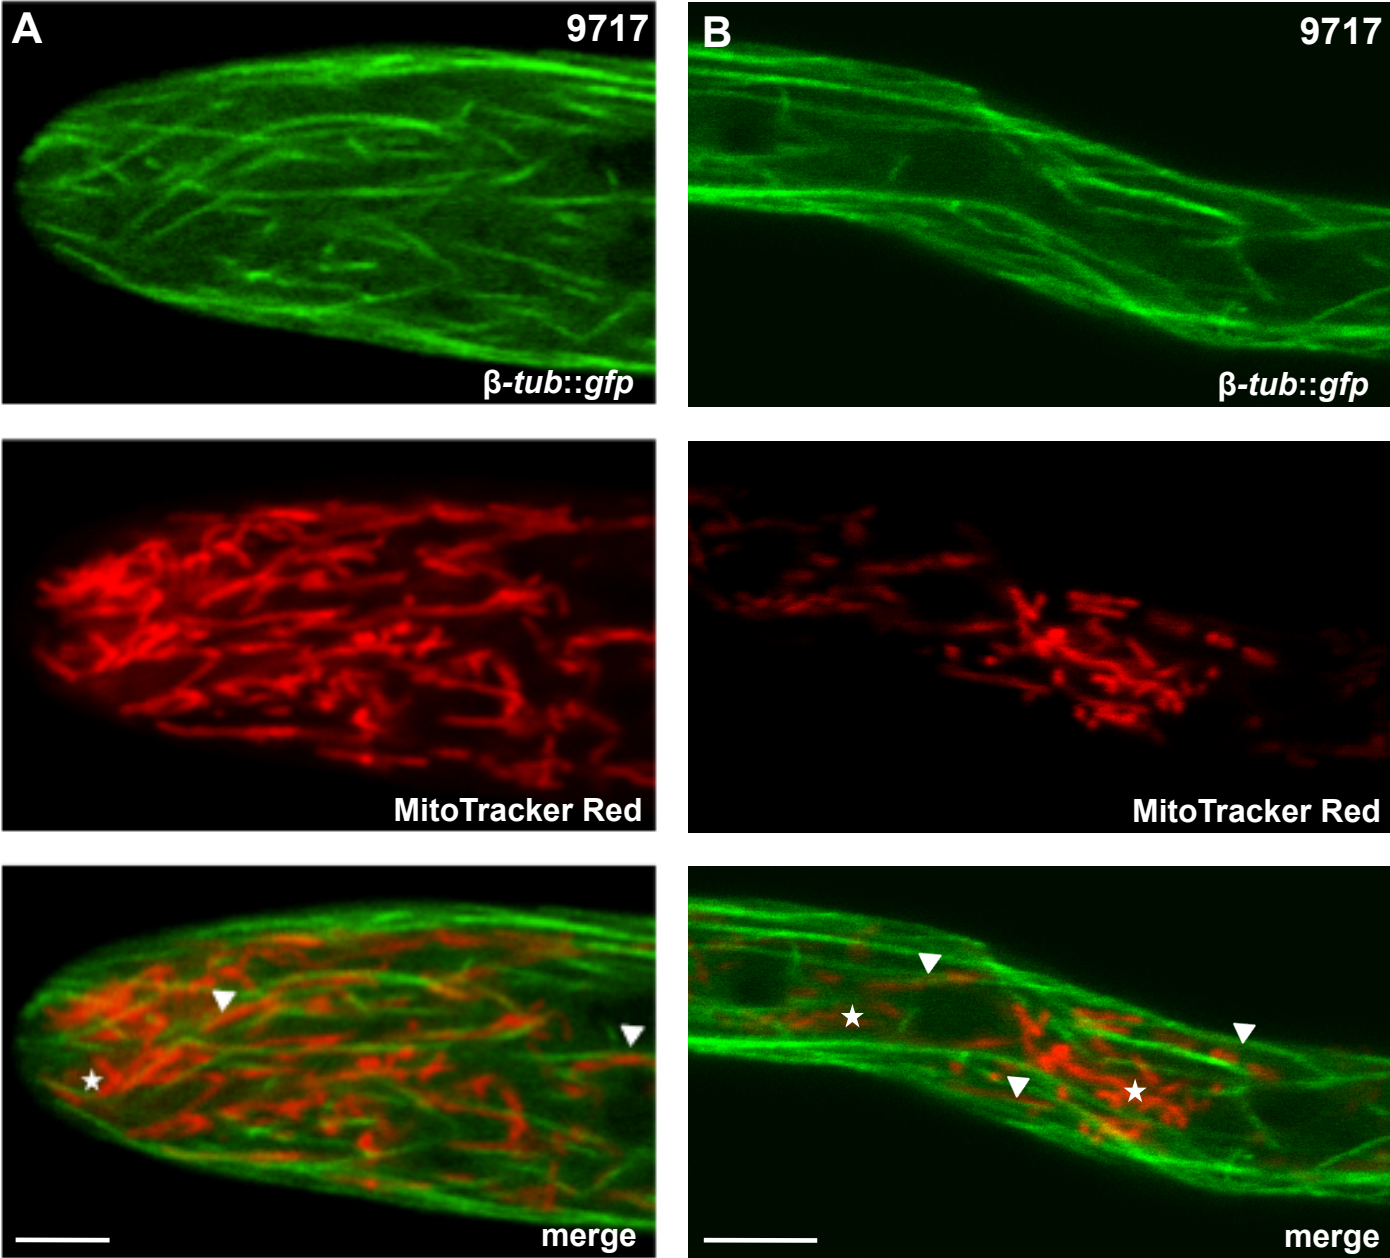

Fig. S6

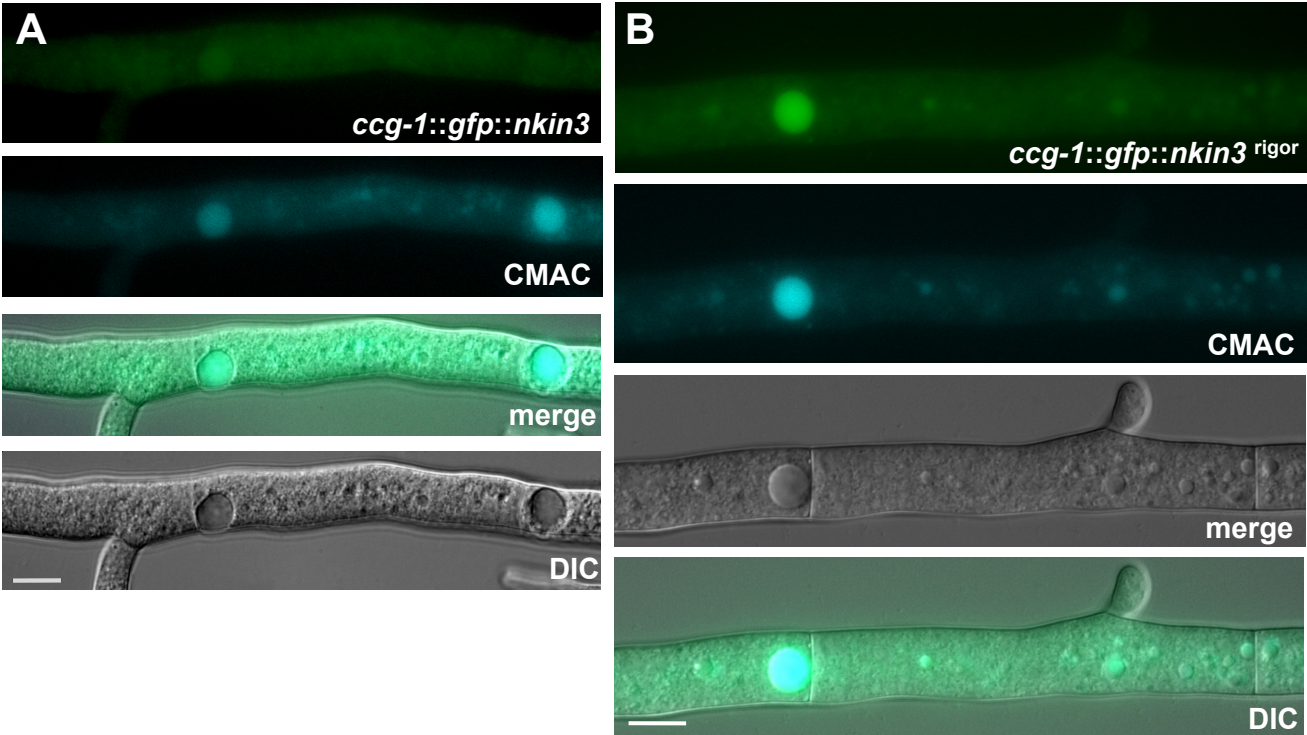

Supplement: EC.00081-13_zek999094126so1.pdf [file EC.00081-13_zek999094126so1.pdf]
